# Supplementary material for: Biological Evaluation and Molecular Docking Studies of Dimethylpyridine Derivatives
Source: MDPI journal article supplement (doi:10.3390/molecules24061093), 2019-03-20
Supplement: s1 [file s1]

## Supporting information

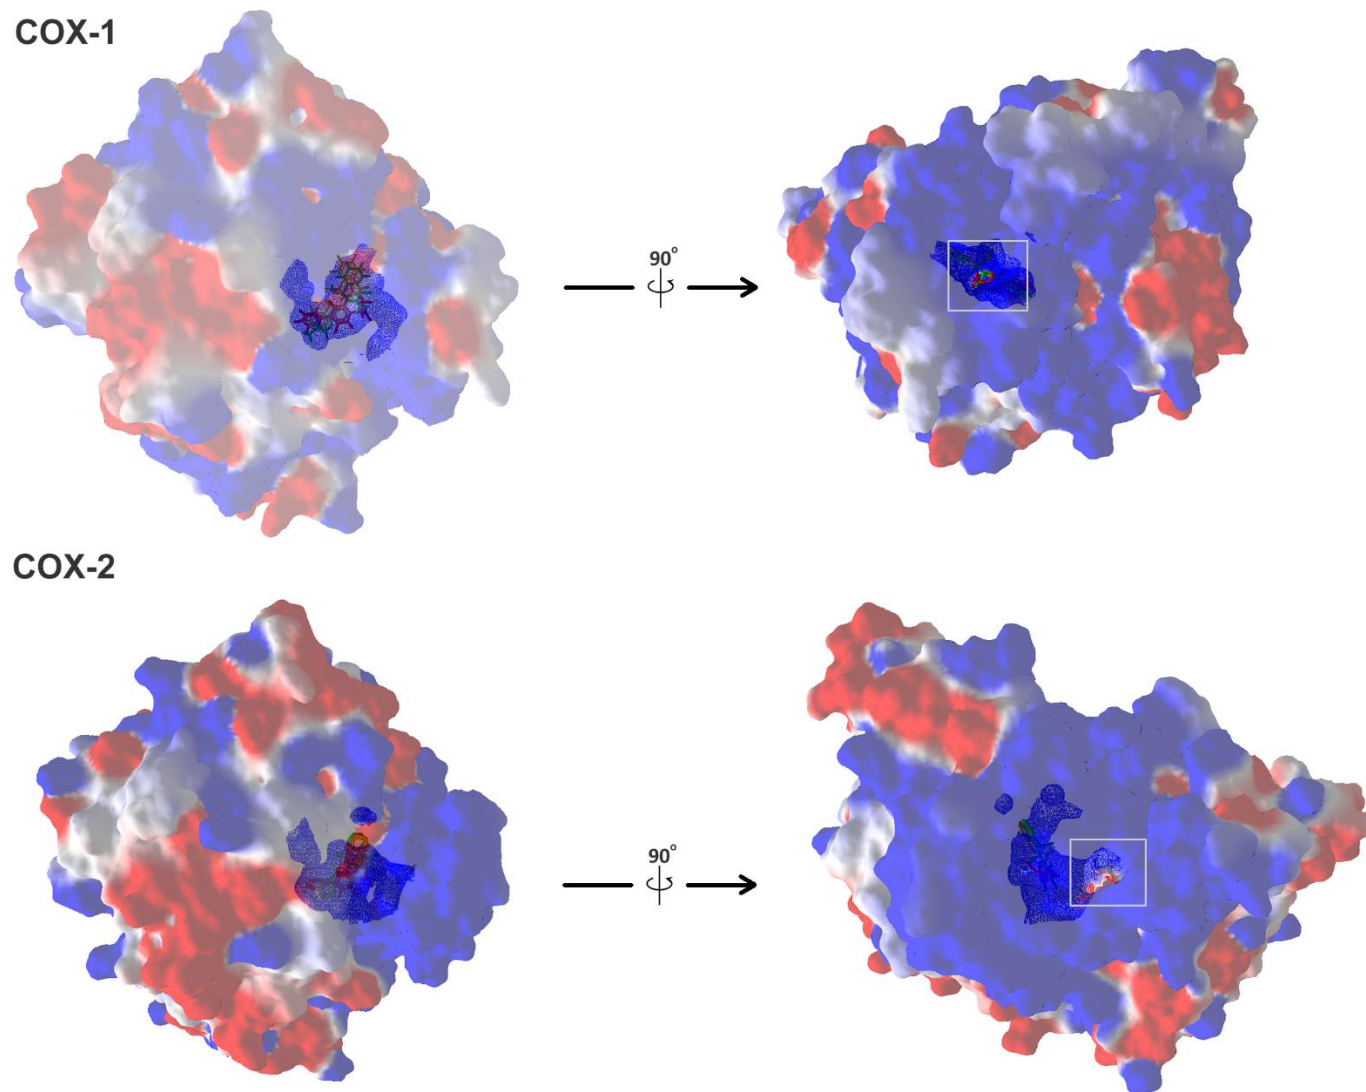

**Figure S1.** Protein surface of COX-1 and COX-2 coloured according to the electrostatic potential (red and blue coloured areas correspond to regions with respectively negatively and positively charged residues).

## Supporting information

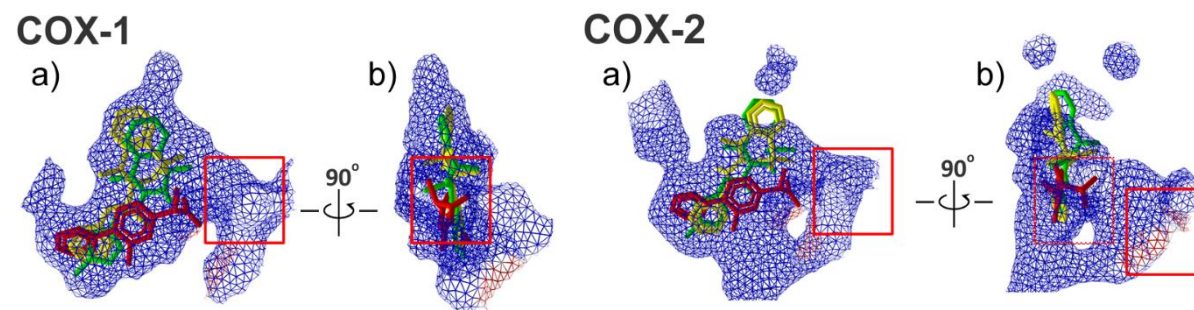

**Figure S2.** Surface of COX-1 and COX-2 binding domain coloured according to the electrostatic potential. Red and blue coloured areas correspond to regions with respectively negatively and positively charged residues; a) view refers to Figure 2; b) view rotated 90° comparing to a) position; red box refers to Figure 2, C box and represents entrance to the protein binding side; red dotted line at COX-2 corresponds to the same position at COX-1.

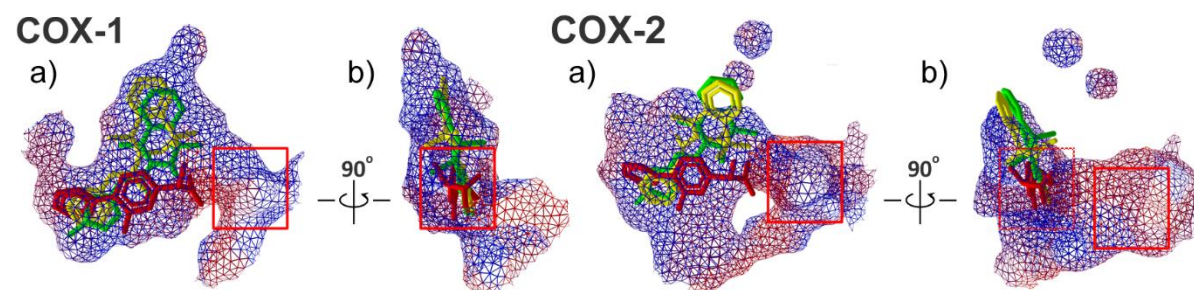

**Figure S3.** Surface of COX-1 and COX-2 binding domain coloured according to the hydropathy index proposed by Kyte and Doolittle (Kyte, J.; Doolittle, R.F. A Simple Method for Displaying the Hydropathic Character of a Protein. *J. Mol. Biol.* **1982**, *157*, 105–132. doi:10.1016/0022-2836(82)90515-0). Hydrophilic residues are coloured red, hydrophobic residues are coloured blue; a) view refers to Figure 2; b) view rotated 90° comparing to a) position; red box refers to C box at Figure 2 and represents entrance to the protein binding side; red dotted line at COX-2 corresponds to the same position at COX-1.

## Supporting information

Table S1. Results and biological activity for COX-1 and COX-2 docking study.

| Name             | COX-1             |                | COX-2             |                |
|------------------|-------------------|----------------|-------------------|----------------|
|                  | pIC <sub>50</sub> | MolDock        | pIC <sub>50</sub> | MolDock        |
| PS33             | 4.29              | -143.78        | 3,84              | -130.689       |
| PS18             | 4.24              | -132.92        | 3,86              | -130.66        |
| PS 42            | 4.14              | -129.37        | 3,75              | -129.07        |
| PS43             | 4.10              | -127.16        | 3,88              | -141.132       |
| PS40             | 4.08              | -118.49        | NA                | -132.22        |
| <b>Meloxicam</b> | <b>4.07</b>       | <b>-86.539</b> | <b>4,15</b>       | <b>-88.866</b> |
| PS19             | 4.03              | -107.393       | NA                | -131.87        |
| <b>Piroxicam</b> | <b>3.77</b>       | <b>-101.59</b> | <b>3,89</b>       | <b>-37.678</b> |
| PS34             | NA                | -127.09        | NA                | -141.1         |
| PS35             | NA                | -136.87        | NA                | -145.3         |
| PS36             | NA                | -115.69        | 3,14              | -138.36        |
| PS38             | NA                | -125.5         | NA                | -128.53        |
| PS39             | NA                | -131.71        | NA                | -136.21        |
| PS41             | NA                | -116.04        | NA                | -138.14        |

## Supporting information

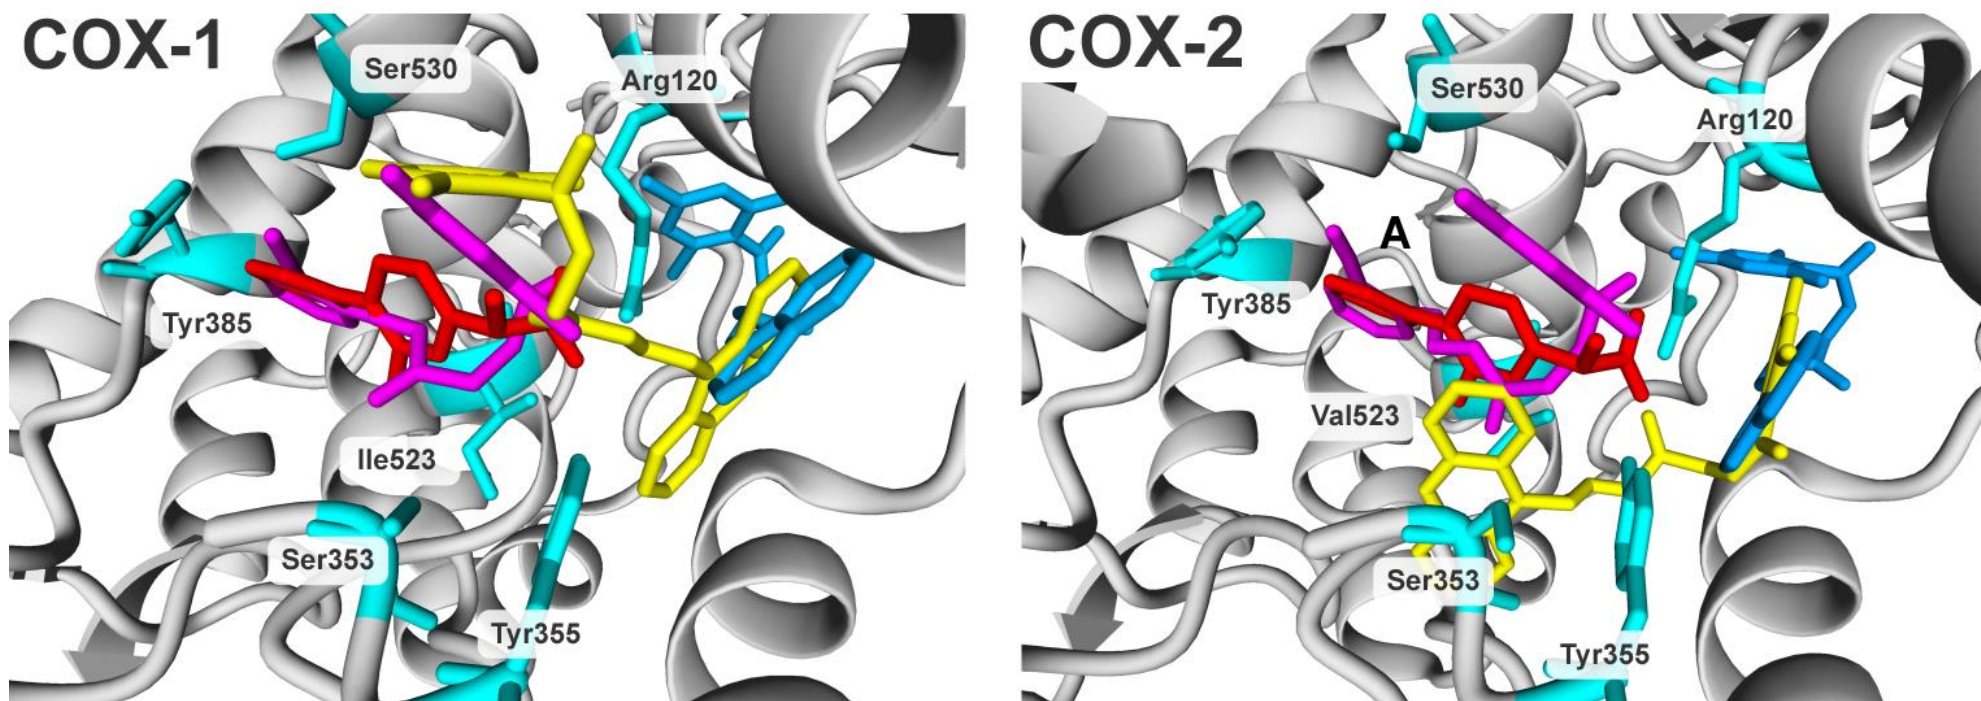

**Figure S4.** An overview of docking positions for PS34 (light blue), PS43 (magenta) and PS35 (yellow) under the COX-1 and COX-2 binding conditions. The flurbiprofen (red) show to facilitate the orientation in the binding cavity.

## Supporting information

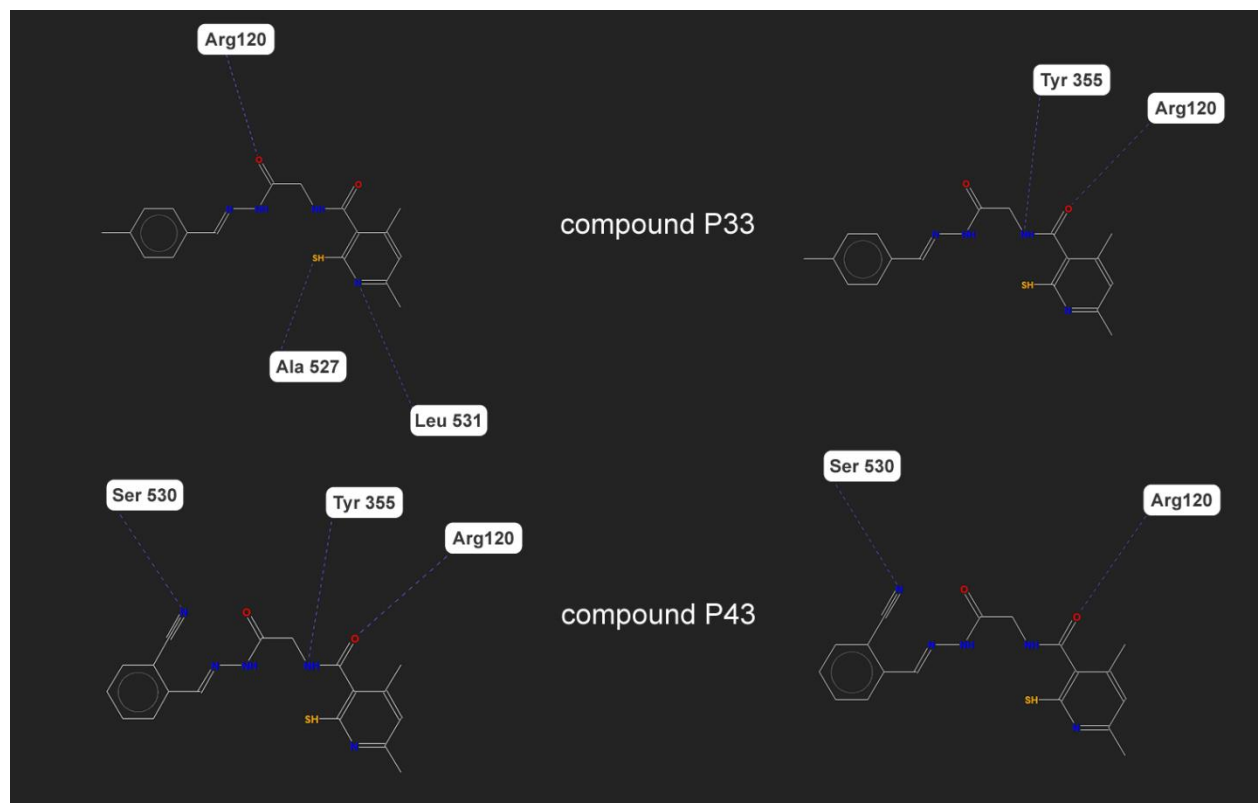

**Figure S5.** Docking poses of PS33 (blue) and PS43 (magenta) under COX-1 and COX-2 binding domain conditions. Ligand maps representing interactions by hydrogen bonds (blue dot line), details in the main text.
